# Supplementary material
Source: HighWire-hosted journal article supplement (http://www.jrheum.org/highwire/filestream/36089/field_highwire_adjunct_files/0/181165DataSuppl.pdf)
Supplement: 181165DataSuppl.pdf [file 181165DataSuppl.pdf]

## ONLINE SUPPLEMENTARY MATERIAL

### Supplementary Table 1. MEDLINE Search Strategy

1. exp arthritis, rheumatoid/
2. ((rheumatoid or reumatoid or revmatoid or rheumatic or reumatic or revmatic or rheumat\* or reumat\* or revmarthrit\*) adj3 (arthrit\* or artrit\* or diseas\* or condition\* or nodule\*)).tw.
3. or/1-2
4. qualitative stud\*.tw.
5. exp Qualitative Research/
6. survey\*.tw.
7. exp Data Collection/
8. questionnaire\*.tw.
9. focus group\*.tw.
10. conjoint analysis.tw.
11. discrete choice experiment\*.tw.
12. rating task\*.tw.
13. ranking task\*.tw.
14. choice experiment\*.tw.
15. decision aid\*.tw.
16. risk attitude\*.tw.
17. risk aversion.tw.
18. discrete choice\*.tw.
19. standard gamble.tw.
20. willingness to pay.tw.
21. willingness-to-pay.tw.
22. decision support technique\*.tw.
23. decision support system\*.tw.
24. decision making.tw.
25. time trade\*.tw.
26. exp Questionnaires/
27. trade off\*.tw.
28. stated preference\*.tw.
29. contingent valuation.tw.
30. choice experiment.tw.
31. or/4-30
32. exp Consumer Satisfaction/
33. exp Consumer Participation/
34. exp Patient Satisfaction/
35. patient perspective\*.tw.
36. exp "Attitude of Health Personnel"/
37. exp Health Knowledge, Attitudes, Practice/
38. exp "Delivery of Health Care"/
39. patient compliance.tw.
40. patient participation.tw.
41. patient satisfaction.tw.
42. treatment refusal.tw.
43. patient preference\*.tw.
44. patient opinion\*.tw.
45. patient belief\*.tw.
46. patient concern\*.tw.
47. patient perspective\*.tw.
48. patient choice\*.tw.

Online supplement to: Patient Preferences for Disease-modifying Antirheumatic Drug Treatment in Rheumatoid Arthritis: A Systematic Review. *The Journal of Rheumatology*. doi:10.3899/jrheum.181165

49. patient value\*.tw.

50. patient priorit\*.tw.

51. exp Health Priorities/

52. patient perception\*.tw.

53. choice behavio\*.tw.

54. patient consensus.tw.

55. exp Consensus/

56. (dissent and dispute\*).tw.

57. uncertain\*.tw.

58. (utility or utilities).ti,ab.

59. discrete choice\*.tw.

60. ((patient\$ or participant\$) adj3 (participation or satisfaction or perspective\$ or compliance or preference\$ or opinion\$ or belief\$ or concern\$ or choice\$ or value\$ or priorit\$ or perception\$ or request\$)).tw.

61. or/32-60

62. 3 and 31 and 61

63. exp animals/ not humans.sh.

64. 62 not 63

**Supplementary Table 2.** Study quality assessment.

| <b>Study ID</b>             | <b>Was the patient population representative of patients with RA? (external validity)</b> | <b>Did the task(s) appropriately represent the choice being evaluated? (quality of construct representation)</b> | <b>Did participants understand the tasks as intended? (construct-irrelevant variance)</b> | <b>Was the data complete and analyzed appropriately? (quality of reporting and analysis)</b> | <b>Other</b>  | <b>Overall study quality</b> |
|-----------------------------|-------------------------------------------------------------------------------------------|------------------------------------------------------------------------------------------------------------------|-------------------------------------------------------------------------------------------|----------------------------------------------------------------------------------------------|---------------|------------------------------|
| Alten 2016(54)              | High                                                                                      | High                                                                                                             | Moderate                                                                                  | High                                                                                         | No difference | High                         |
| Augustovski 2013(40)        | High                                                                                      | Medium                                                                                                           | High                                                                                      | High                                                                                         | Strengthen    | High                         |
| Bacalao 2017(60)            | Medium                                                                                    | High                                                                                                             | High                                                                                      | High                                                                                         | No difference | High                         |
| Bolge 2016(30)              | Low                                                                                       | Medium                                                                                                           | Low                                                                                       | High                                                                                         | No difference | Low                          |
| Buitinga 2012(36)           | Medium                                                                                    | High                                                                                                             | High                                                                                      | High                                                                                         | No difference | High                         |
| Chiou 2005(18)              | Medium                                                                                    | Medium                                                                                                           | Moderate                                                                                  | High                                                                                         | No difference | Medium                       |
| Constantinescu 2009(16, 42) | High                                                                                      | Medium                                                                                                           | Moderate                                                                                  | High                                                                                         | No difference | Medium                       |
| Da Silva 2010(33)           | High                                                                                      | High                                                                                                             | High                                                                                      | High                                                                                         | No difference | High                         |
| Desplats 2017(62)           | High                                                                                      | Medium                                                                                                           | Moderate                                                                                  | High                                                                                         | No difference | Medium                       |
| Ferraz 1994(19)             | Low                                                                                       | Low                                                                                                              | Low                                                                                       | High                                                                                         | No difference | Low                          |
| Fraenkel 2002(26, 27)       | Medium                                                                                    | Medium                                                                                                           | Moderate                                                                                  | High                                                                                         | No difference | Medium                       |
| Fraenkel 2004(17)           | Medium                                                                                    | Medium                                                                                                           | Moderate                                                                                  | High                                                                                         | No difference | Medium                       |
| Fraenkel 2015(41)           | High                                                                                      | Medium                                                                                                           | Moderate                                                                                  | High                                                                                         | No difference | High                         |
| Fraenkel 2016(37)           | Low                                                                                       | High                                                                                                             | High                                                                                      | High                                                                                         | No difference | Medium                       |
| Fraenkel 2017(52)           | Medium                                                                                    | Medium                                                                                                           | Moderate                                                                                  | Medium                                                                                       | No difference | Medium                       |
| Goekoop-Ruiterman 2007(15)  | High                                                                                      | Medium                                                                                                           | Moderate                                                                                  | High                                                                                         | No difference | Medium                       |
| Hazlewood 2016(14, 55)      | High                                                                                      | Medium                                                                                                           | High                                                                                      | High                                                                                         | Strengthen    | High                         |
| Heiberg 2002(34)            | Medium                                                                                    | High                                                                                                             | High                                                                                      | High                                                                                         | No difference | High                         |
| Ho 1998(28)                 | Medium                                                                                    | Low                                                                                                              | Low                                                                                       | Low                                                                                          | Weaken        | Low                          |
| Husni 2017(53)              | Medium                                                                                    | Medium                                                                                                           | Moderate                                                                                  | High                                                                                         | No difference | Medium                       |
| Huynh 2014(63)              | Medium                                                                                    | High                                                                                                             | High                                                                                      | High                                                                                         | No difference | Medium                       |
| Louder 2016(56)             | Low                                                                                       | Medium                                                                                                           | High                                                                                      | High                                                                                         | Weaken        | Low                          |
| Martin 2017(64)             | Medium                                                                                    | Medium                                                                                                           | Moderate                                                                                  | Medium                                                                                       | No difference | Medium                       |
| Navarro-Millan 2016(31)     | Medium                                                                                    | High                                                                                                             | High                                                                                      | High                                                                                         | No difference | Medium                       |

Online supplement to: Patient Preferences for Disease-modifying Antirheumatic Drug Treatment in Rheumatoid Arthritis:  
 A Systematic Review. *The Journal of Rheumatology*. doi:10.3899/jrheum.181165

|                         |        |        |          |        |               |        |
|-------------------------|--------|--------|----------|--------|---------------|--------|
| Nolla 2016(57)          | Medium | Medium | Moderate | High   | No difference | Medium |
| O'Brien 1990(29)        | Low    | Medium | Moderate | High   | No difference | Low    |
| Ozdemir 2009(59)        | Medium | Low    | High     | High   | No difference | Medium |
| Poulos 2014(58)         | Low    | Medium | High     | High   | No difference | Medium |
| Sanderson 2010(35)      | High   | High   | High     | High   | No difference | High   |
| Scarpato 2010(32)       | High   | High   | High     | High   | No difference | High   |
| Skjoldborg 2009(39)     | Medium | Low    | Low      | High   | Strengthen    | Medium |
| Slothuus 2000(23, 24)   | Medium | Medium | High     | High   | Strengthen    | Medium |
| Suarez-Almazor 2001(20) | Medium | High   | High     | High   | Strengthen    | High   |
| Tuominen 2011(25)       | High   | Medium | Moderate | Medium | Weaken        | Medium |
| Van Overbeeke 2017(38)  | Low    | High   | Moderate | High   | No difference | Medium |
| van Tuyl 2017(61)       | High   | High   | High     | High   | No difference | High   |

**Supplementary Table 3.** Relative importance of treatment attributes from Discrete Choice Experiment studies.

| Study ID                  | Attributes                            | Levels<br>(best to worst, from left to right)                                            | Relative Importance | Summary                                                                                                                                                       |
|---------------------------|---------------------------------------|------------------------------------------------------------------------------------------|---------------------|---------------------------------------------------------------------------------------------------------------------------------------------------------------|
| Fraenkel 2017(52)         | Cost                                  | Easy, somewhat, hard to afford                                                           | 24.7                | No benefits considered. Of the AE, bothersome side effects more important than rare or very rare AE.                                                          |
|                           | Bothersome side effects               | 0 to 30%                                                                                 | 20.7                |                                                                                                                                                               |
|                           | Very rare side effects                | GI tear, neuro disease like MS, permanent eye problems, life-threatening brain infection | 13.7                |                                                                                                                                                               |
|                           | Onset of action                       | 2 to 12 weeks                                                                            | 11.5                |                                                                                                                                                               |
|                           | Serious infection                     | 1 to 5%                                                                                  | 11.0                |                                                                                                                                                               |
|                           | Route of administration               | Oral, SC, IV                                                                             | 10.7                |                                                                                                                                                               |
|                           | Time on the market                    | 27 to 3 years                                                                            | 7.8                 |                                                                                                                                                               |
| Husni 2017(53)            | Improvement in physical function      | 0 to 60%                                                                                 | 21.4                | Treatment benefits most important                                                                                                                             |
|                           | Reduction in pain                     | 0 to 75%                                                                                 | 20.7                |                                                                                                                                                               |
|                           | Reduction in number of swollen joints | 0 to 75%                                                                                 | 12.3                |                                                                                                                                                               |
|                           | Route                                 | Oral, SC, IV                                                                             | 10.6                |                                                                                                                                                               |
|                           | Risk of cancer                        | 0 to 2%                                                                                  | 9.5                 |                                                                                                                                                               |
|                           | Monthly co-pay                        | \$0 to \$100                                                                             | 9.4                 |                                                                                                                                                               |
|                           | Dose frequency                        | Monthly, Q2W, daily                                                                      | 6.7                 |                                                                                                                                                               |
|                           | Abnormal lab results                  | 10 to 30%                                                                                | 5.2                 |                                                                                                                                                               |
| Risk of serious infection | 0 to 4%                               | 4.3                                                                                      |                     |                                                                                                                                                               |
| Alten 2016(54)            | Route of administration               | Oral, SC, IV                                                                             | 31.6                | Practical aspects of dosing (route of administration with order from best to worst: oral>SC>IV) more important than side effects (benefits not considered)    |
|                           | Combination therapy with MTX          | No, Yes                                                                                  | 22.8                |                                                                                                                                                               |
|                           | Frequency                             | Q12M to BID                                                                              | 19.2                |                                                                                                                                                               |
|                           | Possible side effects                 | allergy, infection, abnormal labs                                                        | 17.5                |                                                                                                                                                               |
|                           | Onset of benefit                      | 1 to 3 months                                                                            | 9.0                 |                                                                                                                                                               |
| Hazlewood 2016(14)        | Major symptom improvement             | 70 to 30%                                                                                | 30.2                | Treatment benefits most important (symptom improvement, avoiding joint damage). Patients wanted to avoid IV therapy, but other dosing options less important. |
|                           | Serious joint damage                  | 2 to 30%                                                                                 | 23.2                |                                                                                                                                                               |
|                           | Dosing                                | SC vs IV (plus weekly pills)                                                             | 10.9                |                                                                                                                                                               |
|                           |                                       | Daily pills vs 5 non-IV options                                                          | 7.3                 |                                                                                                                                                               |
|                           | Infection, possible risk of cancer    | No, Yes                                                                                  | 11.5                |                                                                                                                                                               |
|                           | Stopping due to side effect           | 2 to 20%                                                                                 | 7.3                 |                                                                                                                                                               |

Online supplement to: Patient Preferences for Disease-modifying Antirheumatic Drug Treatment in Rheumatoid Arthritis: A Systematic Review. *The Journal of Rheumatology*. doi:10.3899/jrheum.181165

|                              |                                                                             |                      |                           |                                                                                                                                                                                                                                                             |
|------------------------------|-----------------------------------------------------------------------------|----------------------|---------------------------|-------------------------------------------------------------------------------------------------------------------------------------------------------------------------------------------------------------------------------------------------------------|
|                              | Possible rare lung or liver reaction                                        | No, Yes              | 6.0                       |                                                                                                                                                                                                                                                             |
|                              | Limit alcohol                                                               | No, Yes              | 2.4                       |                                                                                                                                                                                                                                                             |
|                              | Regular eye exams                                                           | No, Yes              | 1.2                       |                                                                                                                                                                                                                                                             |
| Louder 2016(56)              | Route                                                                       | SC vs IV             | 18.9                      | Dosing considerations more important than side effects and benefits (across the marginal range of benefits considered).                                                                                                                                     |
|                              |                                                                             | Oral vs SC           | 15.2                      |                                                                                                                                                                                                                                                             |
|                              | Frequency                                                                   | Q8W to twice daily   | 16.4                      |                                                                                                                                                                                                                                                             |
|                              | Serious side effects                                                        | 4% to 8%             | 12.0                      |                                                                                                                                                                                                                                                             |
|                              | Monthly co-pay                                                              | \$25 to \$75 USD     | 10.1                      |                                                                                                                                                                                                                                                             |
|                              | Take with another DMARD                                                     | No, Yes              | 9.8                       |                                                                                                                                                                                                                                                             |
|                              | Reduction in joint pain/swelling                                            | 58% to 50%           | 8.9                       |                                                                                                                                                                                                                                                             |
|                              | Improvement in function                                                     | 36% to 32%           | 8.8                       |                                                                                                                                                                                                                                                             |
| Nolla 2016(57)               | Pain relief/ functional improvement                                         | Yes, None            | 37.5                      | Benefits most important, although magnitude of benefit not well defined in survey.                                                                                                                                                                          |
|                              | Risk of AE                                                                  | Low, High            | 24.3                      |                                                                                                                                                                                                                                                             |
|                              | Route                                                                       | SC vs IV             | 21.0                      |                                                                                                                                                                                                                                                             |
|                              | Duration of effect                                                          | 4 to 1 weeks         | 17.2                      |                                                                                                                                                                                                                                                             |
| Poulos 2014(58)              | Immediate serious reaction                                                  | 1% to 25%            | 34.6                      | Serious infusion reactions most important across a very wide range levels (1 to 25%). Benefits more important than other considerations. Route (sc versus IV) least important.                                                                              |
|                              | Medication working well                                                     | 75% to 40%           | 24.2                      |                                                                                                                                                                                                                                                             |
|                              | Frequency                                                                   | 4 per year to Q2W    | 20.1                      |                                                                                                                                                                                                                                                             |
|                              | Time for infusion                                                           | 0 (home) to 4 hours  | 13.0                      |                                                                                                                                                                                                                                                             |
|                              | Immediate mild reaction                                                     | 1% to 25%            | 6.2                       |                                                                                                                                                                                                                                                             |
|                              | Route                                                                       | SC vs IV             | 1.9                       |                                                                                                                                                                                                                                                             |
| Augustovski 2013(40)         | Monthly co-pay                                                              | \$0 to \$1500 USD    | 21.9                      | Frequency and AE more important than benefit, but benefit considered relatively small. Patients wanted to avoid IV therapy, but little difference between SC and oral. Costs considered were over a wide range, as goal was to estimate willingness to pay. |
|                              | Generalized AE                                                              | 0 to 30%             | 18.3                      |                                                                                                                                                                                                                                                             |
|                              | Frequency                                                                   | Q10M to daily        | 16.9                      |                                                                                                                                                                                                                                                             |
|                              | Improvement in patient global                                               | -40 to -20 mm on VAS | 12.4                      |                                                                                                                                                                                                                                                             |
|                              | Route                                                                       | SC vs IV             | 11.4                      |                                                                                                                                                                                                                                                             |
|                              |                                                                             | Oral vs SC           | <0.1                      |                                                                                                                                                                                                                                                             |
|                              | Local AE                                                                    | 0 to 40%             | 10.9                      |                                                                                                                                                                                                                                                             |
| Constantinescu 2009*(16, 42) | Serious infection                                                           | 1 to 5%              | 8.2                       | Overall, treatment benefits more important than dosing and most AEs, except a 'possible increased risk of cancer, which was of similar importance.                                                                                                          |
|                              | Remission                                                                   | 45 to 15%            | 13.4                      |                                                                                                                                                                                                                                                             |
|                              | No joint damage on x-rays                                                   | 80 to 30%            | 12.6                      |                                                                                                                                                                                                                                                             |
|                              | Symptom improvement                                                         | 70 to 40%            | 12.2                      |                                                                                                                                                                                                                                                             |
|                              | Rare, but serious AE (various: cancer, neurologic disease, TB, lung injury) | None to increased    | 6.5 (TB) to 11.9 (cancer) |                                                                                                                                                                                                                                                             |
|                              | Route                                                                       | Oral, SC, IV         | 9.0                       |                                                                                                                                                                                                                                                             |

Online supplement to: Patient Preferences for Disease-modifying Antirheumatic Drug Treatment in Rheumatoid Arthritis: A Systematic Review. *The Journal of Rheumatology*. doi:10.3899/jrheum.181165

|                        |                                                                                                        |                              |                                  |                                                                                                                                                                                            |
|------------------------|--------------------------------------------------------------------------------------------------------|------------------------------|----------------------------------|--------------------------------------------------------------------------------------------------------------------------------------------------------------------------------------------|
|                        | Injection reaction                                                                                     | 0 to 30%                     | 7.4                              |                                                                                                                                                                                            |
|                        | Reversible AE                                                                                          | 0 to 10%                     | 6.6                              |                                                                                                                                                                                            |
| Ozdemir<br>2009(59)**  | Monthly co-pay                                                                                         | \$50 to \$1000               | 44.4                             | Benefits more important than harms and dosing, although wide range of levels for benefits considered. Costs considered were over a wide range, as goal was to estimate willingness to pay. |
|                        | Medication works well                                                                                  | 100% to 25%                  | 23.0                             |                                                                                                                                                                                            |
|                        | Dosing                                                                                                 | 5 sc and IV options          | 10.5                             |                                                                                                                                                                                            |
|                        | Serious infection                                                                                      | 0% to 5%                     | 9.1                              |                                                                                                                                                                                            |
|                        | Onset of effect                                                                                        | 1 to 10 weeks                | 6.8                              |                                                                                                                                                                                            |
|                        | Duration of injection site irritation                                                                  | 15 min to 3 hrs              | 6.2                              |                                                                                                                                                                                            |
| Skjoldborg<br>2009(39) | Monthly co-pay                                                                                         | 0 to 5000 DKK (\$841 USD***) | 78.8                             | Of benefits, reducing fatigue most important (twice as important as a large change in pain), but similar to slightly higher risk minor infection, suggesting patients quite risk averse.   |
|                        | Feeling of being tired                                                                                 | Reduced, unchanged           | 8.8                              |                                                                                                                                                                                            |
|                        | Slightly higher risk minor infection                                                                   | No, Yes                      | 8.3                              |                                                                                                                                                                                            |
|                        | Pain level                                                                                             | 0 to 10                      | 3.6                              |                                                                                                                                                                                            |
|                        | Number swollen joints                                                                                  | 0 to 25                      | 0.3                              |                                                                                                                                                                                            |
|                        | Duration morning stiffness                                                                             | 0 to 120 min                 | <0.1                             |                                                                                                                                                                                            |
| Fraenkel<br>2004(17)   | Less common, but serious AE (various: kidney, liver, cancer, lung)                                     | None to increased            | 6.6 (kidney) to 7.8 (lung)       | Common, reversible AE and less common but serious AE more important than treatment benefits.                                                                                               |
|                        | Common, but reversible AE (various: alopecia, oral ulcers, nausea, injection reaction, rash, diarrhea) | None to increased            | 5.0 (alopecia) to 7.6 (diarrhea) |                                                                                                                                                                                            |
|                        | Route                                                                                                  | Oral vs SC vs IM             | 6.5                              |                                                                                                                                                                                            |
|                        | Drug onset                                                                                             | 2 to 8 weeks                 | 5.9                              |                                                                                                                                                                                            |
|                        | Monthly co-pay                                                                                         | Free to \$30                 | 5.8                              |                                                                                                                                                                                            |
|                        | Physician experience                                                                                   | Available >20 years, new     | 5.4                              |                                                                                                                                                                                            |
|                        | Chance of benefit                                                                                      | 45 to 75% improvement        | 4.6                              |                                                                                                                                                                                            |
|                        | Bone erosions                                                                                          | 60% to 75% do <i>not</i> get | 4.0                              |                                                                                                                                                                                            |

\*Relative importance values are a weighted average of White and Black subgroups, which were reported separately in paper.

\*\*Patient sample split into 2 groups, one of which received 'cheap-talk' text introducing the survey; these estimates from this sample are reported (n=233).

\*\*\*conversion rate 2009: 1USD=5.95DKK

**Supplementary Table 4.** Association between patient characteristics and preferences.

The table summarizes the results of studies that examined a potential relationship between patient variables and preferences. The arrow indicates the direction of the effect, with a sideways arrow (↔) indicating the association was explored and found to not be statistically significant.

| Characteristic                                  | Direction of effect                        | Higher importance placed on |                            |                       |                            | Risk tolerant: prefer more intensive Rx (higher benefit with higher AE) | Willingness to pay |                    |
|-------------------------------------------------|--------------------------------------------|-----------------------------|----------------------------|-----------------------|----------------------------|-------------------------------------------------------------------------|--------------------|--------------------|
|                                                 |                                            | Treatment benefits          | Adverse events             | Treatment costs       | Route (SC > IV)            |                                                                         | Benefits           | Avoid side effects |
| <b>Sociodemographics</b>                        |                                            |                             |                            |                       |                            |                                                                         |                    |                    |
| Age                                             | Younger                                    | ↑↑↔ (17, 39, 40)            | ↔↔↔↔↔ (17, 26, 39, 40, 52) | ↓↔↔↔ (17, 39, 40, 52) | ↔↔↔↔↔ (17, 32, 40, 52, 63) | ↔↔↔ (14, 41, 42)                                                        | ↔ (59)             | ↓ (59)             |
| Sex                                             | Female                                     | ↔ (39)                      | ↓↔↔ (26, 39, 52)           | ↑↔ (39)               | ↔↔ (32)                    | ↔↔↔ (14, 41, 42)                                                        |                    |                    |
| Marital status                                  | Married                                    |                             | ↔ (26)                     |                       |                            | ↑↔ (41, 42)                                                             |                    |                    |
| Number children                                 | More                                       | ↔ (28)                      |                            |                       |                            |                                                                         |                    |                    |
| Smoking                                         | Current                                    | ↔ (28)                      |                            |                       |                            | ↑ (14)                                                                  |                    |                    |
| Ethnicity                                       | Black                                      |                             |                            |                       |                            | ↓↓ (41, 42)                                                             |                    |                    |
|                                                 | Hispanic                                   |                             | ↔ (52)                     | ↔ (52)                | ↑ (52)                     | ↔ (41)                                                                  |                    |                    |
|                                                 | Caucasian                                  |                             | ↔ (52)                     | ↔ (52)                | ↓ (52)                     |                                                                         |                    |                    |
| Income                                          | Higher                                     | ↔↔ (39, 40)                 | ↔↔↔ (39, 40, 52)           | ↓↓↔ (39, 40, 52)      | ↔↔ (40, 52)                | ↑↑↔ (14, 41, 42)                                                        | ↑ (59)             | ↑ (59)             |
| Employment status                               | Employed                                   | ↑ (39)                      | ↔↔↔ (26, 39)               | ↓↔ (39, 52)           | ↔ (52)                     | ↑↔ (41, 42)                                                             |                    |                    |
| Insurance coverage                              | Public (vs other)                          |                             |                            |                       |                            | ↔ (42)                                                                  |                    |                    |
| Education                                       | Higher                                     |                             | ↔↔ (26, 52)                | ↔ (52)                | ↔↔ (26, 52)                | ↑↑↑ (14, 41, 42)                                                        | ↔ (59)             | ↑ (59)             |
| Subjective numeracy                             | Higher                                     |                             |                            |                       |                            | ↑ (41)                                                                  |                    |                    |
| <b>RA disease status and history</b>            |                                            |                             |                            |                       |                            |                                                                         |                    |                    |
| Disease duration                                | Shorter                                    | ↔↔ (28, 39)                 | ↔ (39)                     | ↔ (39)                | ↔ (32)                     | ↔↔↔ (14, 41, 42)                                                        | ↑ (24)             |                    |
| Disease activity (global or composite measures) | Higher                                     |                             |                            |                       |                            | ↔↔ (14, 41)                                                             |                    |                    |
| Arthritis-related health status                 | Better                                     | ↔ (17)                      | ↔↔↔ (17, 26, 52)           | ↔↔ (17, 52)           | ↔↔ (17, 52)                | ↔ (42)                                                                  |                    |                    |
| Functional status                               | Greater disability                         | ↔ (28)                      |                            |                       |                            | ↔ (42)                                                                  |                    |                    |
| Pain                                            | Higher                                     | ↔↔ (28, 39)                 | ↔ (39)                     | ↔ (39)                | ↓ (32)                     |                                                                         | ↑ (24)             |                    |
| Fatigue                                         | Higher                                     | ↔ (39)                      | ↔ (39)                     | ↔ (39)                |                            |                                                                         |                    |                    |
| Swollen joints                                  | More                                       | ↔ (39)                      | ↔ (39)                     | ↔ (39)                |                            |                                                                         |                    |                    |
| Morning stiffness                               | Higher                                     | ↔ (39)                      | ↔ (39)                     | ↔ (39)                |                            |                                                                         | ↑ (25)             |                    |
| <b>RA treatment history</b>                     |                                            |                             |                            |                       |                            |                                                                         |                    |                    |
| Satisfaction with current Rx                    | Dissatisfied due to side effects (Unclear) |                             |                            |                       | ↑ (32)                     |                                                                         |                    |                    |
| Prior treatment                                 |                                            |                             |                            |                       |                            |                                                                         | ↔ (59)             | ↔ (59)             |
| Current RA treatment                            | Biologic vs not                            |                             | ↔ (52)                     | ↔ (52)                | ↔ (52)                     | ↑↔ (41, 42)                                                             |                    |                    |
|                                                 | SC vs IV                                   |                             |                            |                       | ↑ (63)                     |                                                                         |                    |                    |
|                                                 | More intensive vs single                   |                             |                            |                       |                            | ↑ (14)                                                                  |                    |                    |



Online supplement to: Patient Preferences for Disease-modifying Antirheumatic Drug Treatment in Rheumatoid Arthritis: A Systematic Review. *The Journal of Rheumatology*. doi:10.3899/jrheum.181165

|                               |                             |        |              |        |        |        |        |
|-------------------------------|-----------------------------|--------|--------------|--------|--------|--------|--------|
|                               | Greater number prior DMARDs |        |              |        | ↔ (32) |        |        |
|                               | Unclear                     | ↔ (28) |              |        |        |        |        |
| History of AE                 | Prior AE                    | ↔ (39) | ↓ ↔ (26, 39) | ↔ (39) |        |        |        |
| Current drug costs            | Monthly drug expenditures   | ↔ (39) | ↓(39)        | ↔ (39) |        |        | ↑ (24) |
| <b>Other medical history</b>  |                             |        |              |        |        |        |        |
| Comorbidities                 | More                        |        |              |        |        | ↔ (14) |        |
| <b>Clinic characteristics</b> |                             |        |              |        |        |        |        |
| Travel time to clinic         | Greater                     |        |              |        | ↔ (63) |        | ↑ (24) |
| Clinic location               | Public (vs private)         | ↔ (40) | ↔ (40)       | ↔ (40) | ↔ (40) |        |        |

## REFERENCES

1. Elwyn G, Frosch D, Thomson R, Joseph-Williams N, Lloyd A, Kinnersley P, et al. Shared decision making: a model for clinical practice. *J Gen Intern Med* 2012;27:1361-7.
2. Andrews JC, Schünemann HJ, Oxman AD, Pottie K, Meerpohl JJ, Coello PA, et al. GRADE guidelines: 15. Going from evidence to recommendation-determinants of a recommendation's direction and strength. *J Clin Epidemiol* 2013;66:726-35.
3. Andrews J, Guyatt G, Oxman AD, Alderson P, Dahm P, Falck-Ytter Y, et al. GRADE guidelines: 14. Going from evidence to recommendations: the significance and presentation of recommendations. *J Clin Epidemiol* 2013;66:719-25.
4. Ryan M, Scott DA, Reeves C, Bate A, van Teijlingen ER, Russell EM, et al. Eliciting public preferences for healthcare: a systematic review of techniques. *Health Technol Assess* 2001;5:1-186.
5. Hazlewood G. Measuring patient preferences: an overview of methods with a focus on discrete choice experiments. *Rheum Dis Clin North Am* 2018;44:337-47.
6. Froberg DG, Kane RL. Methodology for measuring health-state preferences--II: Scaling methods. *J Clin Epidemiol* 1989;42:459-71.
7. Bridges JF. Stated preference methods in health care evaluation: an emerging methodological paradigm in health economics. *Appl Health Econ Health Policy* 2003;2:213-24.
8. van den Bemt BJ, van Lankveld WG. How can we improve adherence to therapy by patients with rheumatoid arthritis? *Nat Clin Pract Rheumatol* 2007;3:681.
9. Barton JL. Patient preferences and satisfaction in the treatment of rheumatoid arthritis with biologic therapy. *Patient Prefer Adherence* 2009;3:335-44.
10. Medical Subject Headings (MeSH). US National Library of Medicine. (Internet. Assessed April 3, 2018.) Available from: <https://meshb.nlm.nih.gov/record/ui?ui=D057240>
11. Hazlewood GS, Barnabe C, Tomlinson G, Marshall D, Devoe DJ, Bombardier C. Methotrexate monotherapy and methotrexate combination therapy with traditional and biologic disease modifying anti-rheumatic drugs for rheumatoid arthritis: a network meta-analysis. *Cochrane Database Syst Rev* 2016:CD010227.

Online supplement to: Patient Preferences for Disease-modifying Antirheumatic Drug Treatment in Rheumatoid Arthritis: A Systematic Review. *The Journal of Rheumatology*. doi:10.3899/jrheum.181165

12. Purnell TS, Joy S, Little E, Bridges JF, Maruthur N. Patient preferences for noninsulin diabetes medications: a systematic review. *Diabetes Care* 2014;37:2055-62.
13. Eiring Ø, Landmark BF, Aas E, Salkeld G, Nylenna M, Nytroen K. What matters to patients? A systematic review of preferences for medication-associated outcomes in mental disorders. *BMJ Open* 2015;5:e007848.
14. Hazlewood GS, Bombardier C, Tomlinson G, Thorne C, Bykerk VP, Thompson A, et al. Treatment preferences of patients with early rheumatoid arthritis: a discrete-choice experiment. *Rheumatology* 2016;55:1959-68.
15. Goekoop-Ruiterman YP, de Vries-Bouwstra JK, Allaart CF, Kerstens PJ, Grillet BA, de Jager MH, et al. Patient preferences for treatment: report from a randomised comparison of treatment strategies in early rheumatoid arthritis (BeSt trial). *Ann Rheum Dis* 2007;66:1227-32.
16. Constantinescu F, Goucher S, Weinstein A, Smith W, Fraenkel L. Understanding why rheumatoid arthritis patient treatment preferences differ by race. *Arthritis Rheum* 2009;61:413-8.
17. Fraenkel L, Bogardus S, Concato J, Felson D, Wittink D. Patient preferences for treatment of rheumatoid arthritis. *Ann Rheum Dis* 2004;63:1372-8.
18. Chiou CF, Weisman M, Sherbourne CD, Reyes C, Dylan M, Ofman J, et al. Measuring preference weights for American college of rheumatology response criteria for patients with rheumatoid arthritis. *J Rheumatol* 2005;32:2326-9.
19. Ferraz MB, Quaresma MR, Goldsmith CH, Bennett K, Atra E. Corticosteroids in patients with rheumatoid arthritis: utility measurements for evaluating risks and benefits. *Rev Rhum Engl Fr* 1994;61:240-44.
20. Suarez-Almazor ME, Conner-Spady B. Rating of arthritis health states by patients, physicians, and the general public. Implications for cost-utility analyses. *J Rheumatol* 2001;28:648-56.
21. Ferraz MB, Quaresma MR, Goldsmith CH, Bennett K, Atra E. [Estimation of benefits and risks of the treatment of rheumatoid polyarthritis with glucocorticoids using the health-related quality of life measurements]. [Article in French] *Rev Rhum Ed Fr* 1994;61:255-9.
22. Dolan P, Sutton M. Mapping visual analogue scale health state valuations onto standard gamble and time trade-off values. *Soc Sci Med* 1997;44:1519-30.
23. Slothuus U, Brooks RG. Willingness to pay in arthritis: a Danish contribution. *Rheumatology* 2000;39:791-9.
24. Slothuus U, Larsen ML, Junker P. Willingness to pay for arthritis symptom alleviation. Comparison of closed-ended questions with and without follow-up. *Int J Technol Assess Health Care* 2000;16:60-72.
25. Tuominen R, Tuominen S, Möttönen T. How much is a reduction in morning stiffness worth to patients with rheumatoid arthritis? *Scand J Rheumatol Suppl* 2011;125:12-6.
26. Fraenkel L, Bogardus S, Concato J, Felson D. Unwillingness of rheumatoid arthritis patients to risk adverse effects. *Rheumatology* 2002;41:253-61.

Online supplement to: Patient Preferences for Disease-modifying Antirheumatic Drug Treatment in Rheumatoid Arthritis: A Systematic Review. *The Journal of Rheumatology*. doi:10.3899/jrheum.181165

27. Fraenkel L, Bogardus S, Concato J, Felson D. Risk communication in rheumatoid arthritis. *J Rheumatol* 2003;30:443-8.
28. Ho M, Lavery B, Pullar T. The risk of treatment. A study of rheumatoid arthritis patients' attitudes. *Br J Rheumatol* 1998;37:459-60.
29. O'Brien BJ, Elswood J, Calin A. Willingness to accept risk in the treatment of rheumatic disease. *J Epidemiol Community Health* 1990;44:249-52.
30. Bolge SC, Goren A, Brown D, Ginsberg S, Allen I. Openness to and preference for attributes of biologic therapy prior to initiation among patients with rheumatoid arthritis: patient and rheumatologist perspectives and implications for decision making. *Patient Prefer Adherence* 2016;10:1079-90.
31. Navarro-Millan I, Herrinton LJ, Chen L, Harrold L, Liu L, Curtis JR. Comparative effectiveness of etanercept and adalimumab in patient reported outcomes and injection-related tolerability. *PloS One* 2016;11:e0149781.
32. Scarpato S, Antivalle M, Favalli EG, Nacci F, Frigelli S, Bartoli F, et al. Patient preferences in the choice of anti-TNF therapies in rheumatoid arthritis. Results from a questionnaire survey (RIVIERA study). *Rheumatology* 2010;49:289-94.
33. da Silva JA, Ramiro S, Pedro S, Rodrigues A, Vasconcelos JC, Benito-Garcia E. Patients- and physicians- priorities for improvement. The case of rheumatic diseases. *Acta Reumatol Port* 2010;35:192-9.
34. Heiberg T, Kvien TK. Preferences for improved health examined in 1,024 patients with rheumatoid arthritis: pain has highest priority. *Arthritis Rheum* 2002;47:391-7.
35. Sanderson T, Morris M, Calnan M, Richards P, Hewlett S. Patient perspective of measuring treatment efficacy: the rheumatoid arthritis patient priorities for pharmacologic interventions outcomes. *Arthritis Care Res* 2010;62:647-56.
36. Buitinga L, Braakman-Jansen LM, Taal E, van de Laar MA. Worst-case future scenarios of patients with rheumatoid arthritis: a cross-sectional study. *Rheumatology* 2012;51:2027-33.
37. Fraenkel L, Miller AS, Clayton K, Crow-Hercher R, Hazel S, Johnson B, et al. When patients write the guidelines: patient panel recommendations for the treatment of rheumatoid arthritis. *Arthritis Care Res* 2016;68:26-35.
38. van Overbeeke E, De Beleyr B, de Hoon J, Westhovens R, Huys I. Perception of originator biologics and biosimilars: a survey among Belgian rheumatoid arthritis patients and rheumatologists. *BioDrugs* 2017;31:447-59.
39. Skjoldborg US, Lauridsen J, Junker P. Reliability of the discrete choice experiment at the input and output level in patients with rheumatoid arthritis. *Value Health* 2009;12:153-8.
40. Augustovski F, Beratarrechea A, Irazola V, Rubinstein F, Tesolin P, Gonzalez J, et al. Patient preferences for biologic agents in rheumatoid arthritis: a discrete-choice experiment. *Value Health* 2013;16:385-93.
41. Fraenkel L, Cunningham M, Peters E. Subjective numeracy and preference to stay with the status quo. *Med Decis Making* 2015;35:6-11.

Online supplement to: Patient Preferences for Disease-modifying Antirheumatic Drug Treatment in Rheumatoid Arthritis: A Systematic Review. *The Journal of Rheumatology*. doi:10.3899/jrheum.181165

42. Constantinescu F, Goucher S, Weinstein A, Fraenkel L. Racial disparities in treatment preferences for rheumatoid arthritis. *Med Care* 2009;47:350-5.
43. Stacey D, Légaré F, Col NF, Bennett CL, Barry MJ, Eden KB, et al. Decision aids for people facing health treatment or screening decisions. *Cochrane Database Syst Rev* 2014;1:CD001431.
44. Lofland JH, Johnson PT, Ingham MP, Rosemas SC, White JC, Ellis L. Shared decision-making for biologic treatment of autoimmune disease: influence on adherence, persistence, satisfaction, and health care costs. *Patient Prefer Adherence* 2017;11:947-58.
45. Bykerk VP, Akhavan P, Hazlewood GS, Schieir O, Dooley A, Haraoui B, et al; Canadian Rheumatology Association. Canadian Rheumatology Association recommendations for pharmacological management of rheumatoid arthritis with traditional and biologic disease-modifying antirheumatic drugs. *J Rheumatol* 2012;39:1559-82.
46. Singh JA, Saag KG, Bridges SL, Jr., Akl EA, Bannuru RR, Sullivan MC, et al. 2015 American College of Rheumatology guideline for the treatment of rheumatoid arthritis. *Arthritis Rheumatol* 2016;68:1-26.
47. Smolen JS, Landewe R, Bijlsma J, Burmester G, Chatzidionysiou K, Dougados M, et al. EULAR recommendations for the management of rheumatoid arthritis with synthetic and biological disease-modifying antirheumatic drugs: 2016 update. *Ann Rheum Dis* 2017;76:960-77.
48. Paling J. Strategies to help patients understand risks. *BMJ* 2003;327:745-8.
49. Goodacre LJ, Goodacre JA. Factors influencing the beliefs of patients with rheumatoid arthritis regarding disease-modifying medication. *Rheumatology* 2004;43:583-6.
50. Selva A, Sola I, Zhang Y, Pardo-Hernandez H, Haynes RB, Martinez Garcia L, et al. Development and use of a content search strategy for retrieving studies on patients' views and preferences. *Health Qual Life Outcomes* 2017;15:126.
51. Yepes-Nunez JJ, Zhang Y, Xie F, Alonso-Coello P, Selva A, Schunemann H, et al. Forty-two systematic reviews generated 23 items for assessing the risk of bias in values and preferences' studies. *J Clin Epidemiol* 2017;85:21-31.
52. Fraenkel L, Nowell WB, Michel G, Wiedmeyer C. Preference phenotypes to facilitate shared decision-making in rheumatoid arthritis. *Ann Rheum Dis* 2017.
53. Husni ME, Betts KA, Griffith J, Song Y, Ganguli A. Benefit-risk trade-offs for treatment decisions in moderate-to-severe rheumatoid arthritis: focus on the patient perspective. *Rheumatol Int* 2017;37:1423-34.
54. Alten R, Kruger K, Rellecke J, Schiffner-Rohe J, Behmer O, Schiffhorst G, et al. Examining patient preferences in the treatment of rheumatoid arthritis using a discrete-choice approach. *Patient Prefer Adherence* 2016;10:2217-28.
55. Hazlewood GS, Bombardier C, Tomlinson G, Marshall D. A Bayesian model that jointly considers comparative effectiveness research and patients' preferences may help inform GRADE recommendations: an application to rheumatoid arthritis treatment recommendations. *J Clin Epidemiol* 2018;93:56-65.

Online supplement to: Patient Preferences for Disease-modifying Antirheumatic Drug Treatment in Rheumatoid Arthritis: A Systematic Review. *The Journal of Rheumatology*. doi:10.3899/jrheum.181165

56. Louder AM, Singh A, Saverno K, Cappelleri JC, Aten AJ, Koenig AS, et al. Patient preferences regarding rheumatoid arthritis therapies: a conjoint analysis. *Am Health Drug Benefits* 2016;9:84-93.
57. Nolla JM, Rodriguez M, Martin-Mola E, Raya E, Ibero I, Nocea G, et al. Patients' and rheumatologists' preferences for the attributes of biological agents used in the treatment of rheumatic diseases in Spain. *Patient Prefer Adherence* 2016;10:1101-13.
58. Poulos C, Hauber AB, Gonzalez JM, Turpcu A. Patients' willingness to trade off between the duration and frequency of rheumatoid arthritis treatments. *Arthritis Care Res* 2014;66:1008-15.
59. Ozdemir S, Johnson FR, Hauber AB. Hypothetical bias, cheap talk, and stated willingness to pay for health care. *J Health Econ* 2009;28:894-901.
60. Bacalao EJ, Greene GJ, Beaumont JL, Eisenstein A, Muftic A, Mandelin AM, et al. Standardizing and personalizing the treat to target (T2T) approach for rheumatoid arthritis using the Patient-Reported Outcomes Measurement Information System (PROMIS): baseline findings on patient-centered treatment priorities. *Clin Rheumatol* 2017;36:1729-36.
61. van Tuyl LH, Sadlonova M, Hewlett S, Davis B, Flurey C, Goel N, et al. The patient perspective on absence of disease activity in rheumatoid arthritis: a survey to identify key domains of patient-perceived remission. *Ann Rheum Dis* 2017;76:855-61.
62. Desplats M, Pascart T, Jelin G, Norberciak L, Philippe P, Houvenagel E, et al. Are abatacept and tocilizumab intravenous users willing to switch for the subcutaneous route of administration? A questionnaire-based study. *Clin Rheumatol* 2017;36:1395-400.
63. Huynh TK, Ostergaard A, Egsmose C, Madsen OR. Preferences of patients and health professionals for route and frequency of administration of biologic agents in the treatment of rheumatoid arthritis. *Patient Prefer Adherence* 2014;8:93-9.
64. Martin RW, Enck RD, Tellinghuisen DJ, Eggebeen AT, Birmingham JD, Head AJ. Comparison of the Effects of a Pharmaceutical Industry Decision Guide and Decision Aids on Patient Choice to Intensify Therapy in Rheumatoid Arthritis. *Med Decis Making* 2017;37:577-88.
65. Goekoop-Ruiterman YP, de Vries-Bouwstra JK, Allaart CF, van Zeben D, Kerstens PJ, Hazes JM, et al. Clinical and radiographic outcomes of four different treatment strategies in patients with early rheumatoid arthritis (the BeSt study): a randomized, controlled trial. *Arthritis Rheum* 2005;52:3381-90.
